# Supplementary material
Source: PubMed Central journal article supplement (PMC6182113)
Supplement: supp_6.3.E412_2018-0025_original_submission.pdf [file supp_6.3.E412_2018-0025_original_submission.pdf]

1  
2  
3  
4  
5  
6  
7  
8  
9  
10  
11  
12  
13  
14  
15  
16  
17  
18  
19  
20  
21  
22  
23  
24  
25  
26  
27  
28  
29  
30  
31  
32  
33  
34  
35  
36  
37  
38  
39  
40  
41  
42  
43  
44  
45  
46  
47  
48  
49  
50  
51  
52  
53  
54  
55  
56  
57  
58  
59  
60

## Support for a tobacco endgame among smokers in Canada: Findings from the 2016 Wave of the Canadian Arm of the ITC Four Country Tobacco and E-Cigarette Survey

Janet Chung-Hall PhD<sup>1</sup>, Geoffrey T. Fong PhD FRSC<sup>1</sup>, Pete Driezen PhD<sup>1</sup>, Lorraine Craig MHS<sup>1</sup>

Author affiliations

<sup>1</sup>Department of Psychology, University of Waterloo, Ontario, Canada

Correspondence to: Geoffrey T. Fong, gfong@uwaterloo.ca

**Funding statement:** The ITC Four Country E-cigarette Project in the US, Canada, and England was supported by a grant from the National Cancer Institute of the USA (P01 CA200512-01), and a Foundation Grant from the Canadian Institute of Health Research (118096). Additional support was provided to Geoffrey T. Fong from a Senior Investigator Award from the Ontario Institute for Cancer Research.

**Competing interests:** None declared.

## INTRODUCTION

Tobacco use is the leading cause of premature mortality in the world, resulting in more than 6 million preventable deaths each year.<sup>1,2</sup> Although smoking rates among Canadians aged 15 years and older fell from 14.6% in 2013, to an all-time low of 13.0% in 2015,<sup>3</sup> smoking remains the leading cause of preventable disease and premature death.<sup>3-5</sup> In 2012, the total economic burden of smoking in Canada was estimated at \$16.2 billion, with \$6.5 billion in direct health care costs.<sup>6</sup>

Canada has a long history of leadership in tobacco control, and became a Party to the WHO Framework Convention on Tobacco Control (FCTC) in 2004. Canada was the first country to introduce pictorial health warnings on cigarette packages in 2001, ban all flavourings in cigarettes (except for menthol) in 2010, and ban menthol cigarettes in October 2017.<sup>7,8</sup> However, with current policies, Canada's smoking prevalence is only estimated to decrease from 13% to 9% by 2036.<sup>9</sup> Over the next two decades, smoking rates in Ontario are expected to decrease by less than half, while the number of tobacco-attributable deaths will increase – even if all WHO MPOWER measures are fully implemented.<sup>10</sup> In order to reduce tobacco's devastating toll on the health, economy, and social welfare of Canada, there has been a call for the government to consider “tobacco endgame” strategies.

The “tobacco endgame” concept emphasizes the need for innovative policy solutions to end the tobacco epidemic within a specific time.<sup>11-13</sup> Several countries have recently set aggressive targets to drive smoking prevalence down towards zero.<sup>14-17</sup> In September 2016, the Canadian Tobacco Endgame Summit convened leading public health and policy experts to discuss an endgame strategy for Canada.<sup>18,19</sup> The Canadian government has subsequently committed to a target of less than 5% tobacco use by 2035, and is currently developing a new Federal Tobacco Control Strategy to achieve this goal.<sup>20</sup> Public support is critical for driving government actions to ensure that endgame proposals are adopted as laws,<sup>21,22</sup> but little is known about public opinions towards endgame ideas in Canada.

This article reports baseline estimates of support among a national sample of Canadian adult smokers for: (1) tobacco marketing and sales bans, (2) restrictions on the contents of tobacco products, (3) restrictions on access to tobacco products/alternative nicotine products, and (4) restrictions on e-cigarette youth access, content, use in smoke-free places, and promotion.

## METHODS

### Participants and study design

The study used Canadian data from Wave 1 of the ITC Four Country Tobacco and E-Cigarette (4CE1) Survey (collected from July to November 2016). This survey is an expansion of the ITC Four Country Survey, a cohort survey of nationally representative samples of adult smokers (aged 18 years and older) in Australia, Canada, the United Kingdom, and the United States followed up approximately yearly from 2002-2014.

The Canadian 4CE1 cohort sampled included respondents aged 18 to 24 and 25+ from 14 regions using a stratified sampling design, and a supplementary sample of current at-least-weekly e-cigarette users aged 18+. Additional details about the ITC 4CE1 study design and

1 sampling frames have been described elsewhere,<sup>23-25</sup> and methodological details are available on  
2 the ITC website (<http://www.itcproject.org/methods>). Research ethics approval for the Canadian  
3 arm of the 4CE1 Survey was obtained from the University of Waterloo.

4 Respondents reported their province/region of residence, gender, age, ethnicity, annual  
5 household income, and education level (see Table 1 for grouping categories). Due to small  
6 sample sizes in Newfoundland and Labrador, Prince Edward Island, Nova Scotia, and New  
7 Brunswick, these provinces were combined into the “Atlantic” region while Manitoba and  
8 Saskatchewan were combined into the “Prairie” region.

9 Respondents who smoked at least 100 cigarettes and currently smoked at least occasionally were  
10 classified as current smokers. Respondents who ever used an e-cigarette and currently used these  
11 products at least occasionally were classified as current e-cigarette users. Grouping categories for  
12 these variables are presented in Table 1.

### 13 **Outcomes**

14 Respondents were asked how strongly they supported or opposed each of 14 endgame measures  
15 (Table 2).

### 16 **Statistical analysis**

17 The demographic characteristics of the sample were estimated using unweighted descriptive  
18 statistics. Weighted estimates of support for endgame measures were then computed for six  
19 provinces/regions of Canada by cross-tabulating province/region with each endgame measure.

20 Standard errors were estimated using Taylor series linearization to account for the stratified  
21 sampling design. Design-based confidence intervals were estimated using the logit method while  
22 differences in support by demographics, province/region, smoking status, e-cigarette use status,  
23 daily consumption (cigarettes per day (CPD)), and quit intentions were tested using the Wald  $\chi^2$   
24 omnibus test. All analyses were conducted using SAS Version 9.4.

## 25 **RESULTS**

### 26 **Survey response**

27 A total of 3829 respondents completed the ITC 4CE1 Canada Survey. The analyses presented  
28 here are based on 3216 current smokers. Quitters and exclusive e-cigarette users were excluded  
29 (Figure 1).

### 30 **Demographic and smoking characteristics of the sample**

31 Table 1 presents the demographic and smoking characteristics of the 3216 current smokers.

## Policy support

Among policies to ban tobacco marketing and sales, over half of smokers supported a ban on promotional marketing of cigarettes/tobacco (58.9%), and a total ban on cigarettes/tobacco within 10 years if the government provided cessation assistance (43.5%). In comparison, 27.7% of smokers supported plain packaging (Table 3).

Among policies to restrict the contents of tobacco products, support for reductions in cigarette nicotine content was highest at 69.4%. Although a considerable proportion of smokers supported a ban on all additives/flavourings in cigarettes/tobacco (42.9%), only 28.7% supported a ban on menthol cigarettes/tobacco (Table 4).

For restrictions on access to tobacco products/alternative nicotine products, the majority of smokers supported policies to raise the legal age for purchasing cigarettes to 21 years or older (68.8%), and require retail locations that sell cigarettes/tobacco to also sell alternative nicotine products (63.5%). Support for restrictions on the number of places where cigarettes/tobacco can be purchased was lowest (43.9%) (Table 5).

Of the various e-cigarette policies, there was very high support among smokers for a law that would require the same minimum age for the purchase of e-cigarettes as for cigarettes (86.5%). Nearly two-thirds of smokers supported restricting e-cigarette/e-liquid nicotine content (65.7%), and use in smoke-free places (65.7%). More than half of smokers supported a ban on e-cigarette/e-liquid promotion (57.3%). Overall support for a ban on fruit/candy flavoured e-cigarettes was lowest (43.1%) (Table 6).

## Factors associated with support for endgame measures

Weighted multiple logistic regression was used to model the predictors for each of the 14 endgame policies controlling for demographic covariates, perceptions of societal attitudes towards smoking, and belief that smokers are increasingly marginalized.

Tables 3 to 6 show that smokers with plans to quit in the next 6 months were more likely to support all 14 endgame policies.

Smoking status was a significant predictor of support for 10 endgame policies. Compared with non-daily smokers, daily smokers were less likely to support a ban on cigarette/tobacco marketing, total tobacco ban in 10 years if the government provides cessation support, plain packaging, reducing nicotine in cigarettes/tobacco, banning additives/flavourings, banning menthol, and restrictions on where cigarettes/tobacco can be purchased. Daily smokers were also less likely than non-daily smokers to support e-cigarette/e-liquid policies: restricting nicotine content, banning use in smoke-free places, and banning fruit/candy flavours.

Compared to smokers, dual users were more likely support plain packaging, banning menthol, restrictions on where cigarettes/tobacco can be purchased, and requiring retail locations to sell alternative nicotine products. Not surprisingly, dual users were less likely than smokers to support e-cigarette/e-liquid policies: restricting nicotine content, banning use in smoke-free places, banning promotions, and banning fruit/candy flavours.

Support for endgame policies was generally higher among smokers in Quebec; smokers in most provinces/regions were less likely to support a ban on cigarette/tobacco marketing, plain

1  
2  
3 packaging, and reducing nicotine in cigarettes/tobacco than smokers in Quebec. Smokers in  
4 Alberta were also less likely to support a total tobacco ban in 10 years if the government  
5 provides cessation support, and those in the Prairie region were less likely to support requiring  
6 retail locations to sell alternative nicotine products, in comparison with smokers in Quebec.  
7 Compared to smokers in Quebec, those in Ontario, Alberta, and British Columbia were less  
8 likely to support e-cigarette/e-liquid policies that would require the same minimum age for  
9 purchase of e-cigarettes as for cigarettes; those in Ontario and the Prairie region were less likely  
10 to support restricting nicotine in e-cigarettes/e-liquid; and those in all regions/provinces except  
11 British Columbia were less likely to support a ban on e-cigarette/e-liquid promotions.

12  
13  
14  
15  
16 Compared with smokers from low income households, those who did not provide information on  
17 household income were less likely to support: banning additives/flavourings in  
18 cigarettes/tobacco, requiring retail locations to sell alternative nicotine products, and banning  
19 fruit/candy flavoured e-cigarettes. Smokers from high income households were more likely to  
20 support banning e-cigarette/e-liquid promotions.

21  
22  
23 Compared to smokers aged 18 to 24, those aged 55+ were less likely to support plain packaging,  
24 and requiring retail locations to sell alternative nicotine products. Compared to smokers aged 18  
25 to 24, older smokers in all other age groups were more likely to support banning  
26 additive/flavourings in cigarettes/tobacco, and raising the legal age of purchase for cigarettes to  
27 21 years or older. As expected, smokers aged 40 to 54 were also more likely to support requiring  
28 the same minimum age for e-cigarette purchase as for cigarettes, and a banning fruit/candy  
29 flavoured e-cigarettes than smokers aged 18 to 24.

30  
31  
32 Smokers with higher CPD (21-30) were less supportive of restrictions on where  
33 cigarettes/tobacco can be purchased, banning the use of e-cigarettes in smoke-free places, and  
34 banning e-cigarette/e-liquid promotions, compared to those with lower CPD (<10). Highly  
35 educated smokers were more likely to support a ban on cigarette/tobacco marketing, restrictions  
36 on where cigarettes/tobacco can be purchased, banning e-cigarette/e-liquid promotions, and  
37 banning fruit/candy flavoured e-cigarettes than smokers with low education.

38  
39  
40 Gender and ethnicity were not significantly associated with support for the majority of endgame  
41 policies. Compared to females, males were less likely to support a policy requiring retail  
42 locations to sell alternative nicotine products, and more likely to support banning menthol.  
43 Support for a ban on e-cigarette/e-liquid promotions was lower among non-White smokers than  
44 White smokers.

## 45 46 47 **INTERPRETATION**

48  
49 We found strong overall support (>50%) for 8 of 14 endgame measures among smokers. The  
50 majority of smokers supported measures to reduce nicotine in cigarettes (69.4%), raise legal age  
51 for cigarette purchase (68.8%), increase access to alternative nicotine products (63.5%), and ban  
52 tobacco marketing (58.9%). Smokers also strongly supported e-cigarette/e-liquid policies to  
53 require the same minimum age for purchase as cigarettes (86.5%), restrict nicotine content  
54 (65.7%), ban use in smoke-free places (65.7%), and ban promotions (57.3%).  
55  
56  
57  
58  
59  
60

1  
2  
3 There was moderate support for several other market- and product-based endgame proposals.  
4 Overall, 43.9% of smokers supported restrictions on places cigarettes can be purchased, and  
5 43.5% supported a total ban on the sale of cigarettes within 10 years, which is comparable with  
6 smokers' support in other countries.<sup>26-28</sup> Smokers had similar levels of support for banning all  
7 additives/flavourings in cigarettes/tobacco (42.9%) as they did for banning fruit/candy flavours  
8 in e-cigarettes (43.1%).  
9

10  
11 Support for banning menthol was considerably lower than support for reducing nicotine in  
12 cigarettes (28.7% vs. 69.4%). This pattern of findings is consistent with previous studies<sup>29,30</sup> and  
13 may be due to smokers' misperceptions that menthol cigarettes are less harmful than regular  
14 cigarettes.<sup>31,32</sup> Smokers' support for plain packaging (27.7%) is comparable to that observed in  
15 Australia before plain packaging was implemented in that country (28.2%). There, support rose  
16 to ~50% after implementation.<sup>33</sup> At the time of this study, a national menthol ban in Canada was  
17 not yet in force, and plain packaging was under formal consideration. Previous research showing  
18 post-implementation increases in policy support<sup>34-36</sup> suggests that smokers' support for banning  
19 menthol and plain packaging should increase after these policies are implemented in Canada.  
20  
21

22  
23 There were significant regional differences in support for 9 endgame measures. Support for all  
24 three tobacco marketing bans was consistently the highest in Quebec and lowest in Alberta.  
25 Similarly, support for reducing nicotine in cigarettes/tobacco, and banning promotion of e-  
26 cigarettes/e-liquid was highest in Quebec and lowest in Alberta. The strong support in Quebec is  
27 likely due to provincial laws that mandate tobacco control measures that are more stringent than  
28 federal legislation. For example, flip top and slim cigarette package formats, and e-cigarette  
29 advertising/promotion are banned in Quebec.<sup>37</sup> It is unclear why support was lower in Alberta  
30 compared to other regions. It is possible that smokers in Alberta have lower interest in quitting  
31 and higher dependence than smokers in other provinces/regions, which are associated with lower  
32 support for policies to ban the sale of tobacco products,<sup>26,27</sup> and reduce nicotine in cigarettes to  
33 help smokers quit.<sup>38</sup>  
34  
35

36  
37 The most consistent predictor of support was intentions to quit—smokers planning to quit within  
38 6 months were significantly more likely to support all 14 endgame policies. Together with the  
39 finding that 43.5% of smokers would support a total ban on the sale of cigarettes within 10 years  
40 if the government provides cessation assistance, this study clearly demonstrates that many  
41 Canadian smokers have a strong desire to quit and want services to help them to quit. These  
42 results are consistent with other studies showing that nearly all Canadian smokers regret having  
43 started smoking<sup>39</sup> and that the majority are interested in quitting and plan to quit.<sup>40,41</sup> We also  
44 found that daily smokers were less likely to support endgame policies than non-daily smokers,  
45 whereas dual users were more likely to support endgame policies for cigarettes/tobacco than  
46 smokers. This suggests that there is strong need for cessation services, particularly for daily  
47 smokers and dual users.  
48  
49

50  
51 This study has several limitations. First, the ITC 4CE1 Survey results are not representative of  
52 the Aboriginal population of Canada. Approximately 4.2% of the Canadian population (~1.4  
53 million people) identifies as a First Nations person, Métis, or Inuit.<sup>42</sup> It is estimated that 40% of  
54 First Nations and Métis adults smoke, more than twice the rate in the general Canadian  
55  
56  
57  
58  
59  
60



1  
2  
3 population.<sup>43,44</sup> Future studies are needed to assess support for endgame measures among  
4 Aboriginal groups. Second, our sample only included smokers, even though non-smokers make  
5 up more than 85% of the Canadian population.<sup>3</sup> Based on previous studies,<sup>45-47</sup> it is likely that  
6 non-smokers' support for endgame policies is greater than the high levels reported by smokers in  
7 the current study. Finally, smokers may have reported inflated levels of support as smoking is  
8 becoming less socially acceptable in Canada; however, this is unlikely as the present analyses  
9 controlled for smokers' perceived denormalization of smoking.  
10  
11

## 12 **Conclusion**

13  
14 This study demonstrates that the majority of Canadian smokers are likely to support the  
15 introduction of tobacco endgame measures. Our evidence indicates that smokers support  
16 endgame proposals that go well beyond current tobacco control policies. These findings suggest  
17 that the Canadian government has substantial support from smokers to proceed with the  
18 introduction of endgame measures to reduce tobacco prevalence to less than 5% by 2035.  
19  
20  
21  
22  
23  
24  
25  
26  
27  
28  
29  
30  
31  
32  
33  
34  
35  
36  
37  
38  
39  
40  
41  
42  
43  
44  
45  
46  
47  
48  
49  
50  
51  
52  
53  
54  
55  
56  
57  
58  
59  
60

Confidential

## REFERENCES

1. Eriksen M, Mackay J, Schluger N, et al. The Tobacco Atlas. 5th ed. Atlanta: American Cancer Society; 2015. Available: [http://www.tobaccoatlas.org/wp-content/uploads/2015/03/TA5\\_2015\\_WEB.pdf](http://www.tobaccoatlas.org/wp-content/uploads/2015/03/TA5_2015_WEB.pdf) (accessed 2017 Apr 17).
2. World Health Organization. Tobacco Fact Sheet. 2017. Available: <http://www.who.int/mediacentre/factsheets/fs339/en/> (2017 May 15).
3. Statistics Canada. Canadian Tobacco, Alcohol and Drugs Survey, 2015 (updated). 2015. Available: <http://www.statcan.gc.ca/daily-quotidien/161109/dq161109b-eng.htm> (2017 May 10).
4. Rehm J, Baliunas D, Brochu S, et al. The Cost of Substance Abuse in Canada 2002. Ottawa, ON: Canadian Centre on Substance Abuse; 2006.
5. Baliunas D, Patra J, Rehm J, et al. Smoking-attributable mortality and expected years of life lost in Canada 2002: conclusions for prevention and policy. *Chronic Dis Can* 2007;27(4):154–62.
6. Dobrescu A, Bhandari A, Sutherland G, et al. The costs of tobacco use in Canada, 2012. Ottawa, ON: The Conference Board of Canada; 2017.
7. Government of Canada. Tobacco Reporting Regulations (SOR/2000-273). 2000. Available: <http://laws-lois.justice.gc.ca/eng/regulations/SOR-2000-273/> (accessed 2017 May 15).
8. Canada Gazette, Part II. Order Amending the Schedule of the Tobacco Act (Menthol) (SOR/2017-45). 2017. Available: <http://www.gazette.gc.ca/rp-pr/p2/2017/2017-04-05/html/sor-dors45-eng.php> (accessed 2017 May 15).
9. Levy DT. SimSmoke Tobacco Control Policy simulation Modelling Commissioned by Health Canada. Cited by Health Canada, Seizing the opportunity: the future of tobacco control in Canada. 2017 Feb. Available: <https://www.canada.ca/en/health-canada/programs/future-tobacco-control/future-tobacco-control.html> (accessed 2017 Jun 27).
10. Zhang B, Schwartz R. Technical Report of the Ontario SimSmoke: The Effect of Tobacco Control Strategies and Interventions on Smoking Prevalence and Tobacco Attributable Deaths in Ontario, Canada. Toronto, ON: Ontario Tobacco Research Unit, 2013.
11. Malone RE. Tobacco endgames: what they are and are not, issues for tobacco control strategic planning and a possible US scenario. *Tob Control* 2013;22(Suppl 1):i42–4.
12. Smith EA. Questions for a tobacco-free future. *Tob Control* 2013;22(Suppl 1):i1–2.
13. Malone RE, McDaniel PA, Smith EA. Tobacco Control Endgames: Global Initiatives and Implications for the UK. London, UK: Cancer Research UK, 2014. Available:



- 1  
2  
3  
4  
5  
6  
7  
8  
9  
10  
11  
12  
13  
14  
15  
16  
17  
18  
19  
20  
21  
22  
23  
24  
25  
26  
27  
28  
29  
30  
31  
32  
33  
34  
35  
36  
37  
38  
39  
40  
41  
42  
43  
44  
45  
46  
47  
48  
49  
50  
51  
52  
53  
54  
55  
56  
57  
58  
59  
60
- [https://www.cancerresearchuk.org/sites/default/files/policy\\_july2014\\_fullendgame\\_report.pdf](https://www.cancerresearchuk.org/sites/default/files/policy_july2014_fullendgame_report.pdf) (accessed 2017 Jun 26).
14. Government of Ireland. Tobacco Free Ireland. Report of the Tobacco Policy Review Group. Dublin, Ireland: Department of Health, 2013 Oct. Available: <http://health.gov.ie/wp-content/uploads/2014/03/TobaccoFreeIreland.pdf> (accessed 2017 May 10).
  15. New Zealand Government. Government Final Response to Report of the Māori Affairs Committee on Inquiry into the Tobacco Industry in Aotearoa and the Consequences of Tobacco Use for Māori (Final Response), Presented to the House of Representatives in Accordance with Standing Order 248. Wellington, New Zealand: New Zealand Parliament, 2011 Feb. Available: [https://www.parliament.nz/resource/en-nz/49DBHOH\\_PAP21175\\_1/9f015010d386fe11050cddfbb468c2a3f5b0cb89](https://www.parliament.nz/resource/en-nz/49DBHOH_PAP21175_1/9f015010d386fe11050cddfbb468c2a3f5b0cb89) (accessed 2017 Sep 22).
  16. The Scottish Government. Creating a Tobacco-Free Generation. A Tobacco Control Strategy for Scotland. Edinburgh, UK: Scottish Government, 2013 Mar. Available: <http://www.gov.scot/Resource/0041/00417331.pdf> (accessed 2017 May 10).
  17. Ministry of Social Affairs and Health. Roadmap to a Tobacco-Free Finland. Action Plan for Tobacco Control. Helsinki, Finland: Ministry of Social Affairs and Health, 2014. Available: [https://julkaisut.valtioneuvosto.fi/bitstream/handle/10024/70305/URN\\_ISBN\\_978-952-00-3513-6.pdf?sequence=1](https://julkaisut.valtioneuvosto.fi/bitstream/handle/10024/70305/URN_ISBN_978-952-00-3513-6.pdf?sequence=1) (accessed 2017 Sep 21).
  18. Arnes C. Media Advisory - Queen's University hosts Summit on the Creation of a Tobacco Endgame for Canada. 2016. Available: <http://www.queensu.ca/gazette/media/media-advisory-queens-university-hosts-summit-creation-tobacco-endgame-canada> (accessed 2017 Aug 29).
  19. Steering Committee and Action Groups for Canadian National Tobacco Endgame Initiative. A Tobacco Endgame for Canada. Summit Background Paper Prepared for the Canadian Tobacco Endgame Summit, September 30 to October 1, 2016. 2016 Aug. Available: <http://www.queensu.ca/gazette/sites/default/files/assets/attachments/EndgameSummit-Backgroundpaper%20.pdf> (accessed 2017 Aug 29).
  20. Government of Canada. Seizing the Opportunity: The Future of Tobacco Control in Canada. Ottawa, ON: Health Canada, 2017 Feb. Available: <https://www.canada.ca/content/dam/hc-sc/documents/programs/future-tobacco-control/future-tobacco-control-consultation-eng.pdf> (accessed 2017 May 10).
  21. Thomson G, Wilson N, Blakely T, et al. Ending appreciable tobacco use in a nation: using a sinking lid on supply. *Tob Control* 2010;19(5):431–5.
  22. Wilson N, Thomson GW, Edwards R, et al. Potential advantages and disadvantages of an endgame strategy: a “sinking lid” on tobacco supply. *Tob Control* 2013;22(Suppl 1):i18–21.

- 1
  - 2
  - 3
  - 4
  - 5
  - 6
  - 7
  - 8
  - 9
  - 10
  - 11
  - 12
  - 13
  - 14
  - 15
  - 16
  - 17
  - 18
  - 19
  - 20
  - 21
  - 22
  - 23
  - 24
  - 25
  - 26
  - 27
  - 28
  - 29
  - 30
  - 31
  - 32
  - 33
  - 34
  - 35
  - 36
  - 37
  - 38
  - 39
  - 40
  - 41
  - 42
  - 43
  - 44
  - 45
  - 46
  - 47
  - 48
  - 49
  - 50
  - 51
  - 52
  - 53
  - 54
  - 55
  - 56
  - 57
  - 58
  - 59
  - 60
23. Fong GT, Cummings KM, Borland R, et al. The conceptual framework of the International Tobacco Control (ITC) Policy Evaluation Project. *Tob Control* 2006;15(Suppl 3):iii3-11.
24. Thompson ME, Fong GT, Hammond D, et al. Methods of the International Tobacco Control (ITC) Four Country Survey. *Tob Control* 2006;15(Suppl 3):iii12-18.
25. ITC Project. ITC Four Country Tobacco and E-cigarette Survey Wave 1 (2016) Technical Report. 2017 Oct. Available: [http://www.itcproject.org/files/4CE1\\_Technical\\_Report\\_Oct32017-Final.pdf](http://www.itcproject.org/files/4CE1_Technical_Report_Oct32017-Final.pdf) (accessed 2017 Oct 3).
26. Edwards R, Wilson N, Peace J, et al. Support for a tobacco endgame and increased regulation of the tobacco industry among New Zealand smokers: results from a National Survey. *Tob Control* 2013;22(e1):e86–93.
27. Shahab L, West R. Public support in England for a total ban on the sale of tobacco products. *Tob Control* 2010;19(2):143–147.
28. Connolly GN, Behm I, Heaton CG, et al. Public attitudes regarding banning of cigarettes and regulation of nicotine. *Am J Public Health* 2012;102(4):e1–2.
29. Fix BV, O’Connor RJ, Fong GT, et al. Smokers’ reactions to FDA regulation of tobacco products: findings from the 2009 ITC United States survey. *BMC Public Health* 2011;11:941.
30. Bolcic-Jankovic D, Biener L. Public opinion about FDA regulation of menthol and nicotine. *Tob Control* 2015;24(e4):e241–5.
31. King B, Yong HH, Borland R, et al. Malaysian and Thai smokers’ beliefs about the harmfulness of “light” and menthol cigarettes. *Tob Control* 2010;19(6):444–50.
32. Brennan E, Gibson L, Momjian A, et al. Are young people’s beliefs about menthol cigarettes associated with smoking-related intentions and behaviors? *Nicotine Tob Res* 2015;17(1):81–90.
33. Swift E, Borland R, Cummings KM, et al. Australian smokers’ support for plain or standardised packs before and after implementation: findings from the ITC Four Country Survey. *Tob Control* 2015;24(6):616–21.
34. Fong GT, Hyland A, Borland R, et al. Reductions in tobacco smoke pollution and increases in support for smoke-free public places following the implementation of comprehensive smoke-free workplace legislation in the Republic of Ireland: findings from the ITC Ireland/UK Survey. *Tob Control* 2006;15(Suppl 3):iii51-58.
35. Nagelhout GE, Mons U, Allwright S, et al. Prevalence and predictors of smoking in “smoke-free” bars. Findings from the International Tobacco Control (ITC) Europe Surveys. *Soc Sci Med* 2011 May;72(10):1643–51.

- 1  
2  
3  
4  
5  
6  
7  
8  
9  
10  
11  
12  
13  
14  
15  
16  
17  
18  
19  
20  
21  
22  
23  
24  
25  
26  
27  
28  
29  
30  
31  
32  
33  
34  
35  
36  
37  
38  
39  
40  
41  
42  
43  
44  
45  
46  
47  
48  
49  
50  
51  
52  
53  
54  
55  
56  
57  
58  
59  
60
36. Wakefield MA, Hayes L, Durkin S, et al. Introduction effects of the Australian plain packaging policy on adult smokers: a cross-sectional study. *BMJ Open* 2013;3(7).
  37. National Assembly of Quebec. Bill 44, An Act to Bolster Tobacco Control. 2015. Available: <http://www.assnat.qc.ca/en/travaux-parlementaires/projets-loi/projet-loi-44-41-1.html> (accessed 2017 Oct 5).
  38. Pearson JL, Abrams DB, Niaura RS, et al. Public support for mandated nicotine reduction in cigarettes. *Am J Public Health* 2013;103(3):562–7.
  39. Fong GT, Hammond D, Laux FL, et al. The near-universal experience of regret among smokers in four countries: Findings from the International Tobacco Control Policy Evaluation Survey. *Nicotine Tob Res* 2004;6(Suppl 3):S341–51.
  40. Siahpush M, Yong HH, Borland R, et al. Smokers with financial stress are more likely to want to quit but less likely to try or succeed: findings from the International Tobacco Control (ITC) Four Country Survey. *Addiction* 2009;104(8):1382–90.
  41. Reid JL, Hammond D, Boudreau C, et al. Socioeconomic disparities in quit intentions, quit attempts, and smoking abstinence among smokers in four western countries: findings from the International Tobacco Control Four Country Survey. *Nicotine Tob Res* 2010;12(Suppl 1):S20–33.
  42. Statistics Canada. Aboriginal peoples in Canada: First Nations, Métis and Inuit. National Household Survey, 2011. 2013. Available: <http://www12.statcan.gc.ca/nhs-enm/2011/as-sa/99-011-x/99-011-x2011001-eng.pdf> (accessed 2017 Aug 22).
  43. Health Canada. Canadian Tobacco Use Monitoring Survey (CTUMS): Smoking prevalence 1999 to 2012. 2012. Available: <https://www.canada.ca/en/health-canada/services/publications/healthy-living/canadian-tobacco-use-monitoring-survey-smoking-prevalence-1999-2012.html> (accessed 2017 Jun 26).
  44. Ryan CJ, Leatherdale ST, Cooke MJ. A cross-sectional examination of the correlates of current smoking among off-reserve First Nations and Métis adults: evidence from the 2012 Aboriginal Peoples Survey. *Addict Behav* 2016;54:75–81.
  45. Lykke M, Pisinger C, Glümer C. Ready for a goodbye to tobacco? — Assessment of support for endgame strategies on smoking among adults in a Danish regional health survey. *Prev Med* 2016;83:5–10.
  46. Trainer E, Gall S, Smith A, et al. Public perceptions of the tobacco-free generation in Tasmania: adults and adolescents. *Tob Control* 2017;26(4):458–60.
  47. Gendall P, Hoek J, Maubach N, et al. Public support for more action on smoking. *N Z Med J Online* 2013;126(1375). Available: <http://search.proquest.com/openview/77e4f5db686ac9eb2a7d4150c67b1702/1?pq-origsite=gscholar&cbl=1056335> (accessed 2017 May 3).

1  
2  
3  
4  
5  
6  
7  
8  
9  
10  
11  
12  
13  
14  
15  
16  
17  
18  
19  
20  
21  
22  
23  
24  
25  
26  
27  
28  
29  
30  
31  
32  
33  
34  
35  
36  
37  
38  
39  
40  
41  
42  
43  
44  
45  
46  
47  
48  
49  
50  
51  
52  
53  
54  
55  
56  
57  
58  
59  
60

Confidential

**Figure 1:** Selection of respondents to the ITC 4CE1 Survey for inclusion in the study

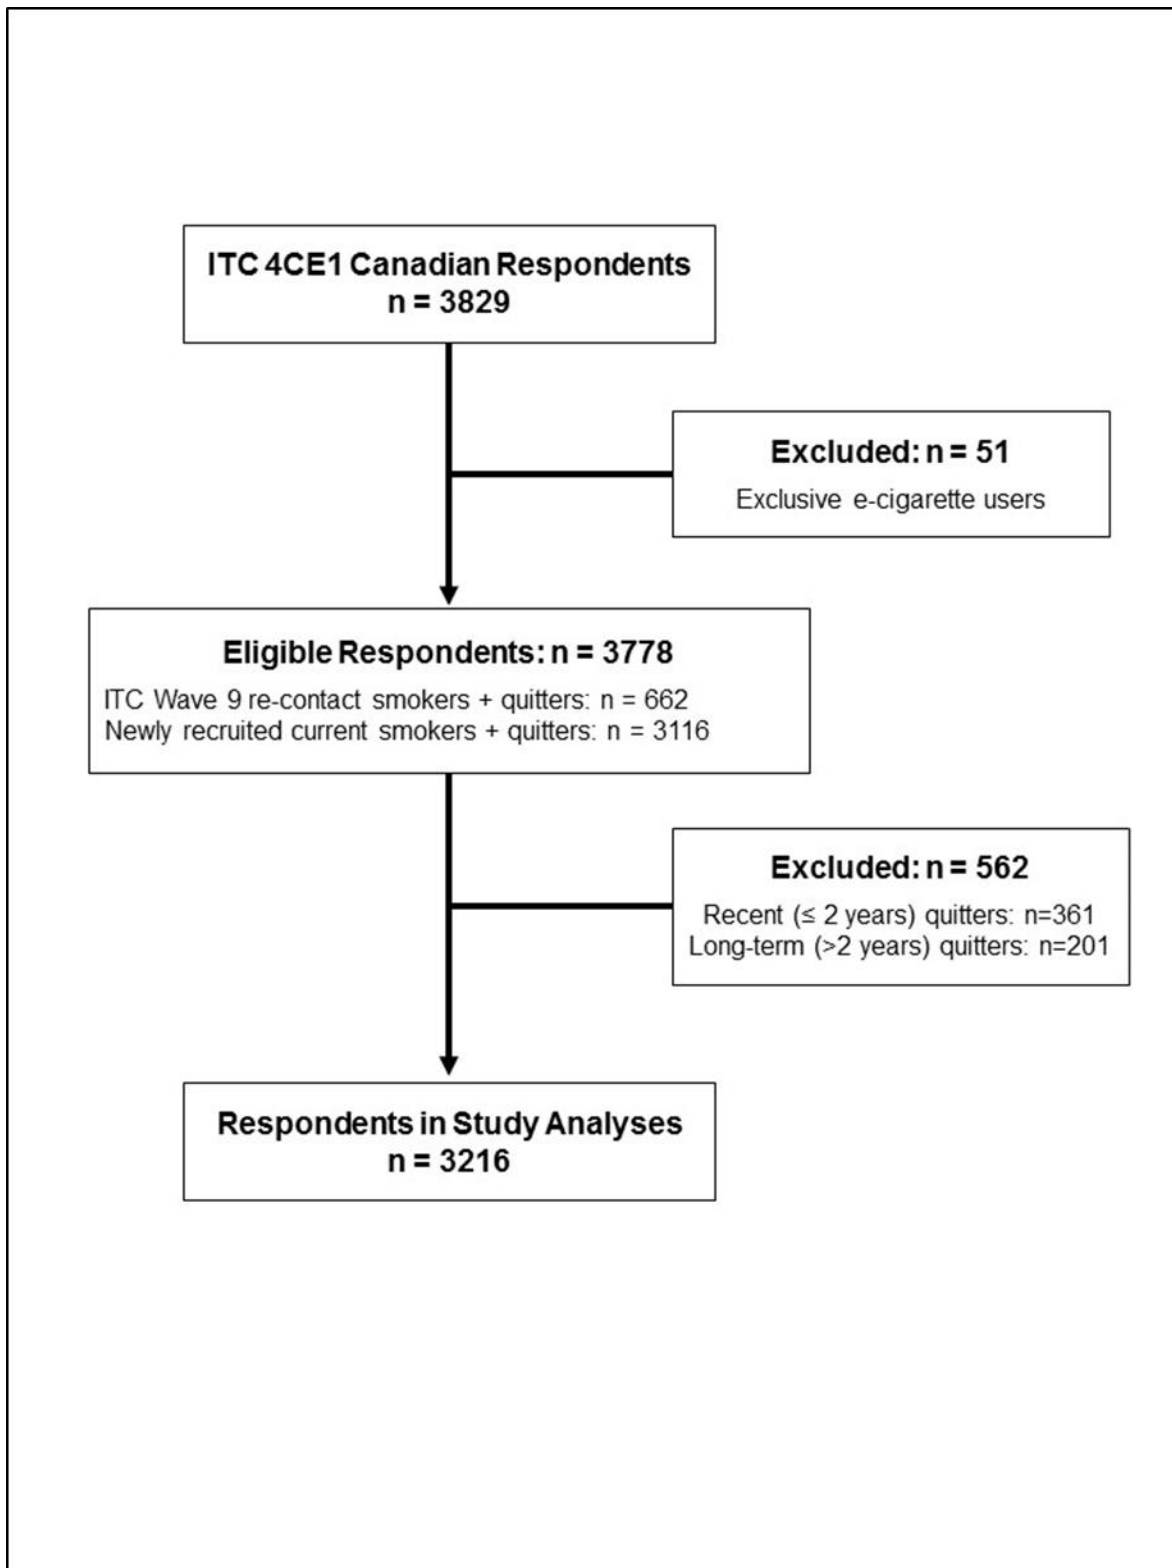

**Table 1:** Demographic and smoking characteristics of sample

| Characteristic                      | Categories                                          | Unweighted N (%) |
|-------------------------------------|-----------------------------------------------------|------------------|
| <b>Province/Region</b>              | Atlantic <sup>†</sup>                               | 227 (7.1)        |
|                                     | Quebec                                              | 743 (23.1)       |
|                                     | Ontario                                             | 1268 (39.4)      |
|                                     | Prairie <sup>††</sup>                               | 225 (7.0)        |
|                                     | Alberta                                             | 355 (11.0)       |
|                                     | British Columbia                                    | 398 (12.4)       |
| <b>Recruitment source</b>           | ITC Project                                         | 322 (10.0)       |
|                                     | Canada Leger web panel                              | 2894 (90.0)      |
| <b>Gender</b>                       | Female                                              | 1698 (52.8)      |
|                                     | Male                                                | 1518 (47.2)      |
| <b>Age group (years)</b>            | 18-24                                               | 760 (23.6)       |
|                                     | 25-39                                               | 829 (25.8)       |
|                                     | 40-54                                               | 895 (27.8)       |
|                                     | 55+                                                 | 732 (22.8)       |
| <b>Ethnicity<sup>‡</sup></b>        | White                                               | 2573 (81.4)      |
|                                     | Non-white                                           | 588 (18.6)       |
| <b>Household income</b>             | Low (< \$30,000)                                    | 720 (22.4)       |
|                                     | Moderate (\$30,000-\$44,999)                        | 510 (15.9)       |
|                                     | High (\$45,000+)                                    | 1751 (54.4)      |
|                                     | No answer                                           | 235 (7.3)        |
| <b>Education level<sup>‡‡</sup></b> | Low (high school or less)                           | 933 (29.3)       |
|                                     | Moderate (technical/trades/college/some university) | 1404 (44.0)      |
|                                     | High (completed university/post-graduate)           | 851 (26.7)       |
| <b>Smoking status</b>               | Non-daily smoker                                    | 995 (30.9)       |
|                                     | Daily smoker                                        | 2221 (69.1)      |
| <b>E-cigarette use status</b>       | Smoker (use cigarettes only)                        | 1391 (43.3)      |
|                                     | Dual user (use cigarettes and e-cigarettes)         | 1825 (56.7)      |

<sup>†</sup> “Atlantic”: Newfoundland and Labrador, Prince Edward Island, Nova Scotia, New Brunswick.

<sup>††</sup> “Prairie”: Manitoba and Saskatchewan

<sup>‡</sup> Missing responses: n=55

<sup>‡‡</sup> Missing responses: n=28



**Table 2:** Endgame measures and response options used in the analysis

| Endgame measure                                                                                                                                                                              | Response options <sup>†</sup>                      |
|----------------------------------------------------------------------------------------------------------------------------------------------------------------------------------------------|----------------------------------------------------|
| 1. “Would you support or oppose a law that bans the use of promotional marketing for cigarettes/tobacco, such as coupons and price discounts?”                                               | Strongly support/support<br>Strongly oppose/oppose |
| 2. “Would you support or oppose a law that totally bans cigarettes and other smoked tobacco within 10 years, if the government provides assistance such as clinics to help smokers quit?”    | Strongly support/support<br>Strongly oppose/oppose |
| 3. “Tobacco companies should be required to sell cigarettes in plain packages; that is, in packs without the usual brand colours and symbols, but keeping warning labels.”                   | Strongly agree/agree<br>Strongly disagree/disagree |
| 4. “If you could get nicotine in products other than tobacco, would you support or oppose a law that reduced the amount of nicotine in cigarettes and tobacco, to make them less addictive?” | Strongly support/support<br>Strongly oppose/oppose |
| 5. “Would you support or oppose a law that bans all additives, including flavourings, in cigarettes/tobacco?”                                                                                | Strongly support/support<br>Strongly oppose/oppose |
| 6. “Would you support or oppose a law that bans the use of menthol in cigarettes/tobacco?”                                                                                                   | Strongly support/support<br>Strongly oppose/oppose |
| 7. “Would you support or oppose a law that raises the legal age of purchasing cigarettes/tobacco to 21 years and older?”                                                                     | Strongly support/support<br>Strongly oppose/oppose |
| 8. “Would you support or oppose a law that restricts the number of places where cigarettes/tobacco could be purchased?”                                                                      | Strongly support/support<br>Strongly oppose/oppose |
| 9. “Would you support or oppose a law that requires shops/stores that sell cigarettes/ tobacco to also sell alternative nicotine products like e-cigarettes and nicotine medications?”       | Strongly support/support<br>Strongly oppose/oppose |
| 10. “Would you support or oppose a law that requires the same minimum age for buying e-cigarettes as for cigarettes?”                                                                        | Strongly support/support<br>Strongly oppose/oppose |
| 11. “Would you support or oppose a law that limits the amount of nicotine allowed in e-cigarettes and/or e-liquid?”                                                                          | Strongly support/support<br>Strongly oppose/oppose |
| 12. “Would you support or oppose a law that bans the use of e-cigarettes in places where smoking is already banned?”                                                                         | Strongly support/support<br>Strongly oppose/oppose |
| 13. “Would you support or oppose a law that bans e-cigarette and e-liquid promotions, such as free samples, coupons, and price discounts?”                                                   | Strongly support/support<br>Strongly oppose/oppose |
| 14. “Would you support or oppose a law that bans fruit and candy flavours in e-cigarettes?”                                                                                                  | Strongly support/support<br>Strongly oppose/oppose |

<sup>†</sup>Response options for the question on support for plain packaging were: strongly agree, agree, neither agree or disagree, disagree, strongly disagree, refused, and don’t know. For all other questions, response options were: strongly support, support, oppose, strongly oppose, refused, and don’t know. For analysis, response options were dichotomized into “strongly agree/agree” versus “strongly disagree/disagree” or “strongly support/support” versus “strongly oppose/oppose”. All other response options (“refused” and “don’t know”) were excluded.

**Table 3.** Factors associated with support for tobacco marketing and sales bans

|                   | Ban on promotional marketing of cigarettes/tobacco <sup>S</sup> |                  | Total ban on cigarettes/tobacco within 10 years if government provides cessation assistance <sup>S</sup> |                  | Require sale of cigarettes in plain packages <sup>S</sup> |                  |
|-------------------|-----------------------------------------------------------------|------------------|----------------------------------------------------------------------------------------------------------|------------------|-----------------------------------------------------------|------------------|
|                   | %Support                                                        | OR (95% CI)      | %Support                                                                                                 | OR (95% CI)      | %Support                                                  | OR (95% CI)      |
| Overall           | 58.9                                                            |                  | 43.5                                                                                                     |                  | 27.7                                                      |                  |
| Gender            |                                                                 | p=.093           |                                                                                                          | p=.240           |                                                           | p=.631           |
| Female            | 55.1                                                            | 1.00             | 41.2                                                                                                     | 1.00             | 27.1                                                      | 1.00             |
| Male              | 61.5                                                            | 1.21 (0.97-1.51) | 45.0                                                                                                     | 1.14 (0.92-1.41) | 28.1                                                      | 1.06 (0.83-1.36) |
| Age Group (years) |                                                                 | p=.655           |                                                                                                          | p=.757           |                                                           | p=.009           |
| 18-24             | 62.2                                                            | 1.00             | 45.4                                                                                                     | 1.00             | 36.2                                                      | 1.00             |
| 25-39             | 62.2                                                            | 0.90 (0.62-1.31) | 48.3                                                                                                     | 1.19 (0.82-1.72) | 30.8                                                      | 0.83 (0.56-1.22) |
| 40-54             | 57.4                                                            | 0.80 (0.55-1.14) | 41.6                                                                                                     | 1.02 (0.71-1.46) | 28.3                                                      | 0.79 (0.55-1.56) |
| 55+               | 56.1                                                            | 0.84 (0.58-1.22) | 40.2                                                                                                     | 1.06 (0.73-1.53) | 20.4                                                      | 0.54 (0.36-0.80) |
| Ethnicity         |                                                                 | p=.251           |                                                                                                          | p=.130           |                                                           | p=.876           |
| White             | 59.1                                                            | 1.00             | 42.6                                                                                                     | 1.00             | 27.4                                                      | 1.00             |
| Non-white         | 58.0                                                            | 0.82 (0.58-1.15) | 48.7                                                                                                     | 1.28 (0.93-1.78) | 29.2                                                      | 0.97 (0.68-1.39) |
| Household income  |                                                                 | p=.024           |                                                                                                          | p=.329           |                                                           | p=.627           |
| Low               | 52.4                                                            | 1.00             | 44.8                                                                                                     | 1.00             | 28.9                                                      | 1.00             |
| Moderate          | 57.5                                                            | 1.10 (0.75-1.60) | 45.0                                                                                                     | 0.89 (0.62-1.29) | 28.5                                                      | 1.01 (0.66-1.53) |
| High              | 63.2                                                            | 1.24 (0.92-1.68) | 43.6                                                                                                     | 0.87 (0.65-1.17) | 27.7                                                      | 0.90 (0.64-1.27) |
| No answer         | 41.6                                                            | 0.65 (0.41-1.04) | 34.3                                                                                                     | 0.64 (0.40-1.03) | 21.2                                                      | 0.72 (0.42-1.24) |
| Education level   |                                                                 | p=.006           |                                                                                                          | p=.874           |                                                           | p=.673           |
| Low               | 51.4                                                            | 1.00             | 41.6                                                                                                     | 1.00             | 26.9                                                      | 1.00             |
| Moderate          | 57.0                                                            | 1.05 (0.80-1.38) | 43.4                                                                                                     | 1.03 (0.79-1.34) | 26.3                                                      | 0.92 (0.68-1.25) |
| High              | 70.4                                                            | 1.67 (1.18-2.37) | 45.8                                                                                                     | 1.09 (0.78-1.51) | 30.8                                                      | 1.06 (0.74-1.52) |
| Province/region   |                                                                 | p<.001           |                                                                                                          | p=.030           |                                                           | p=.005           |
| Quebec            | 68.9                                                            | 1.00             | 48.5                                                                                                     | 1.00             | 35.3                                                      | 1.00             |
| Atlantic†         | 61.1                                                            | 0.77 (0.47-1.24) | 44.5                                                                                                     | 0.84 (0.54-1.33) | 27.6                                                      | 0.76 (0.46-1.26) |
| Ontario           | 53.9                                                            | 0.52 (0.39-0.70) | 44.6                                                                                                     | 0.79 (0.60-1.05) | 27.1                                                      | 0.71 (0.52-0.95) |
| Prairie‡          | 54.8                                                            | 0.60 (0.39-0.93) | 40.0                                                                                                     | 0.76 (0.48-1.20) | 18.4                                                      | 0.45 (0.26-0.79) |
| Alberta           | 50.3                                                            | 0.42 (0.28-0.63) | 32.8                                                                                                     | 0.48 (0.32-0.73) | 19.4                                                      | 0.46 (0.29-0.71) |
| British Columbia  | 63.1                                                            | 0.77 (0.50-1.19) | 43.2                                                                                                     | 0.77 (0.52-1.16) | 28.9                                                      | 0.77 (0.50-1.18) |

|                                |      |                  |      |                  |      |                  |
|--------------------------------|------|------------------|------|------------------|------|------------------|
| Smoking status                 |      | <b>p&lt;.001</b> |      | <b>p&lt;.001</b> |      | <b>p&lt;.001</b> |
| Non-daily smoker               | 72.0 | 1.00             | 52.0 | 1.00             | 37.3 | 1.00             |
| Daily smoker                   | 54.1 | 0.53 (0.38-0.73) | 40.4 | 0.51 (0.38-0.70) | 24.2 | 0.51 (0.37-0.71) |
| E-cigarette use status         |      | p=.763           |      | p=.156           |      | <b>p&lt;.001</b> |
| Smoker                         | 58.6 | 1.00             | 43.1 | 1.00             | 26.3 | 1.00             |
| Dual user                      | 60.9 | 0.97 (0.81-1.17) | 47.3 | 1.14 (0.95-1.36) | 36.7 | 1.40 (1.15-1.70) |
| CPD                            |      | p=.055           |      | p=.377           |      | p=.211           |
| <10                            | 65.9 | 1.00             | 45.9 | 1.00             | 31.0 | 1.00             |
| 11-20                          | 51.2 | 0.71 (0.53-0.95) | 39.8 | 1.06 (0.79-1.42) | 23.9 | 1.01 (0.73-1.41) |
| 21-30                          | 49.4 | 0.67 (0.46-0.98) | 43.3 | 1.36 (0.93-2.00) | 21.8 | 0.92 (0.59-1.45) |
| >30                            | 56.1 | 1.11 (0.51-2.40) | 39.8 | 1.45 (0.65-3.23) | 38.7 | 2.38 (1.01-5.58) |
| Plans to quit in next 6 months |      | <b>p&lt;.001</b> |      | <b>p&lt;.001</b> |      | <b>p&lt;.001</b> |
| No                             | 50.6 | 1.00             | 30.5 | 1.00             | 22.6 | 1.00             |
| Yes                            | 62.1 | 1.94 (1.51-2.50) | 48.5 | 2.51 (1.94-3.24) | 29.6 | 1.61 (1.21-2.14) |

<sup>s</sup> Logistic regression models control for smokers' perceptions of societal attitudes towards smoking, and beliefs that smokers are increasingly marginalized.

<sup>†</sup> "Atlantic": Newfoundland and Labrador, Prince Edward Island, Nova Scotia, New Brunswick

<sup>‡</sup> "Prairie": Manitoba and Saskatchewan

Table 4. Factors associated with support for restrictions on contents of tobacco products

|                   | Reduce nicotine in cigarettes/tobacco to make them less addictive <sup>S</sup> |                  | Ban all additives and flavourings in cigarettes/tobacco <sup>S</sup> |                  | Ban menthol in cigarettes/tobacco <sup>S</sup> |                  |
|-------------------|--------------------------------------------------------------------------------|------------------|----------------------------------------------------------------------|------------------|------------------------------------------------|------------------|
|                   | %Support                                                                       | OR (95% CI)      | %Support                                                             | OR (95% CI)      | %Support                                       | OR (95% CI)      |
| Overall           | 69.4                                                                           |                  | 42.9                                                                 |                  | 28.7                                           |                  |
| Gender            |                                                                                | p=.396           |                                                                      | p=.096           |                                                | p<.001           |
| Female            | 70.3                                                                           | 1.00             | 39.6                                                                 | 1.00             | 22.7                                           | 1.00             |
| Male              | 68.9                                                                           | 0.90 (0.72-1.14) | 45.1                                                                 | 1.20 (0.97-1.49) | 32.7                                           | 1.63 (1.29-2.07) |
| Age Group (years) |                                                                                | p=.784           |                                                                      | p<.001           |                                                | p=.549           |
| 18-24             | 73.4                                                                           | 1.00             | 34.7                                                                 | 1.00             | 29.0                                           | 1.00             |
| 25-39             | 69.4                                                                           | 0.83 (0.55-1.25) | 41.7                                                                 | 1.54 (1.05-2.27) | 28.9                                           | 1.07 (0.70-1.62) |
| 40-54             | 68.7                                                                           | 0.87 (0.59-1.28) | 42.5                                                                 | 1.83 (1.25-2.66) | 29.1                                           | 1.25 (0.83-1.88) |
| 55+               | 68.6                                                                           | 0.93 (0.63-1.39) | 47.9                                                                 | 2.45 (1.66-3.60) | 28.0                                           | 1.31 (0.86-1.99) |
| Ethnicity         |                                                                                | p=.944           |                                                                      | p=.805           |                                                | p=.458           |
| White             | 69.6                                                                           | 1.00             | 42.8                                                                 | 1.00             | 28.1                                           | 1.00             |
| Non-white         | 68.5                                                                           | 0.99 (0.68-1.43) | 43.1                                                                 | 1.04 (0.75-1.45) | 32.1                                           | 1.15 (0.80-1.64) |
| Household income  |                                                                                | p=.505           |                                                                      | p=.032           |                                                | p=.050           |
| Low               | 66.5                                                                           | 1.00             | 44.9                                                                 | 1.00             | 29.5                                           | 1.00             |
| Moderate          | 71.3                                                                           | 1.19 (0.81-1.75) | 47.2                                                                 | 0.91 (0.63-1.31) | 33.6                                           | 1.09 (0.73-1.63) |
| High              | 70.5                                                                           | 1.18 (0.86-1.60) | 42.3                                                                 | 0.76 (0.56-1.01) | 28.5                                           | 0.86 (0.62-1.19) |
| No answer         | 63.8                                                                           | 0.89 (0.55-1.44) | 30.8                                                                 | 0.52 (0.32-0.83) | 16.2                                           | 0.49 (0.28-0.87) |
| Education level   |                                                                                | p=.822           |                                                                      | p=.074           |                                                | p=.641           |
| Low               | 68.5                                                                           | 1.00             | 44.1                                                                 | 1.00             | 27.5                                           | 1.00             |
| Moderate          | 69.0                                                                           | 0.92 (0.69-1.22) | 40.2                                                                 | 0.75 (0.57-0.97) | 29.6                                           | 1.03 (0.75-1.39) |
| High              | 71.2                                                                           | 0.96 (0.68-1.37) | 45.9                                                                 | 0.91 (0.66-1.26) | 28.6                                           | 0.89 (0.62-1.27) |
| Province/region   |                                                                                | p=.007           |                                                                      | p=.249           |                                                | p=.221           |
| Quebec            | 77.1                                                                           | 1.00             | 44.0                                                                 | 1.00             | 33.7                                           | 1.00             |
| Atlantic†         | 70.8                                                                           | 0.75 (0.46-1.22) | 41.0                                                                 | 0.94 (0.60-1.47) | 26.9                                           | 0.78 (0.47-1.27) |
| Ontario           | 67.9                                                                           | 0.63 (0.46-0.86) | 43.8                                                                 | 0.96 (0.73-1.27) | 28.5                                           | 0.80 (0.59-1.09) |
| Prairie‡          | 63.8                                                                           | 0.54 (0.34-0.85) | 46.5                                                                 | 1.24 (0.80-1.91) | 22.6                                           | 0.63 (0.37-1.07) |
| Alberta           | 63.0                                                                           | 0.48 (0.31-0.74) | 34.4                                                                 | 0.65 (0.43-0.99) | 22.8                                           | 0.59 (0.37-0.95) |
| British Columbia  | 67.0                                                                           | 0.59 (0.38-0.92) | 46.4                                                                 | 1.06 (0.71-1.58) | 31.4                                           | 0.91 (0.59-1.39) |

|                                |      |                  |      |                  |      |                  |
|--------------------------------|------|------------------|------|------------------|------|------------------|
| Smoking status                 |      | <b>p=.041</b>    |      | <b>p=.020</b>    |      | <b>p=.003</b>    |
| Non-daily smoker               | 74.5 | 1.00             | 48.4 | 1.00             | 35.5 | 1.00             |
| Daily smoker                   | 67.6 | 0.70 (0.50-0.99) | 40.9 | 0.69 (0.51-0.95) | 26.3 | 0.61 (0.44-0.84) |
| E-cigarette use status         |      | <b>p=.484</b>    |      | <b>p=.859</b>    |      | <b>p=.020</b>    |
| Smoker                         | 69.0 | 1.00             | 42.9 | 1.00             | 27.9 | 1.00             |
| Dual user                      | 72.4 | 1.07 (0.88-1.30) | 42.4 | 1.02 (0.85-1.22) | 34.0 | 1.26 (1.04-1.54) |
| CPD                            |      | <b>p=.228</b>    |      | <b>p=.095</b>    |      | <b>p=.284</b>    |
| <10                            | 72.3 | 1.00             | 46.2 | 1.00             | 32.1 | 1.00             |
| 11-20                          | 68.4 | 0.91 (0.67-1.24) | 38.4 | 0.69 (0.52-0.93) | 24.5 | 0.77 (0.56-1.07) |
| 21-30                          | 60.7 | 0.66 (0.44-0.99) | 41.0 | 0.74 (0.50-1.11) | 24.6 | 0.72 (0.47-1.12) |
| >30                            | 62.6 | 0.81 (0.37-1.80) | 39.0 | 0.70 (0.34-1.45) | 32.8 | 1.14 (0.48-2.71) |
| Plans to quit in next 6 months |      | <b>p&lt;.001</b> |      | <b>p&lt;.001</b> |      | <b>p&lt;.001</b> |
| No                             | 60.2 | 1.00             | 34.6 | 1.00             | 20.1 | 1.00             |
| Yes                            | 73.0 | 1.91 (1.47-2.47) | 46.0 | 1.90 (1.47-2.44) | 32.0 | 2.14 (1.59-2.88) |

<sup>s</sup> Logistic regression models control for smokers' perceptions of societal attitudes towards smoking, and beliefs that smokers are increasingly marginalized.

<sup>†</sup> "Atlantic": Newfoundland and Labrador, Prince Edward Island, Nova Scotia, New Brunswick

<sup>‡</sup> "Prairie": Manitoba and Saskatchewan

**Table 5.** Factors associated with support for restrictions on access to tobacco products/alternative nicotine products

|                   | Raise legal age for cigarette purchase to 21+ years <sup>S</sup> |                  | Restrict places where cigarettes/tobacco can be purchased <sup>S</sup> |                  | Require retail locations to sell alternative nicotine products <sup>S</sup> |                  |
|-------------------|------------------------------------------------------------------|------------------|------------------------------------------------------------------------|------------------|-----------------------------------------------------------------------------|------------------|
|                   | %Support                                                         | OR (95% CI)      | %Support                                                               | OR (95% CI)      | %Support                                                                    | OR (95% CI)      |
| Overall           | 68.8                                                             |                  | 43.9                                                                   |                  | 63.5                                                                        |                  |
| Gender            |                                                                  | p=.141           |                                                                        | p=.819           |                                                                             | p=.024           |
| Female            | 70.2                                                             | 1.00             | 43.1                                                                   | 1.00             | 66.4                                                                        | 1.00             |
| Male              | 67.9                                                             | 0.84 (0.67-1.06) | 44.5                                                                   | 1.03 (0.82-1.28) | 61.5                                                                        | 0.77 (0.62-0.97) |
| Age Group (years) |                                                                  | p=.005           |                                                                        | p=.681           |                                                                             | p=.008           |
| 18-24             | 60.0                                                             | 1.00             | 46.6                                                                   | 1.00             | 71.2                                                                        | 1.00             |
| 25-39             | 71.3                                                             | 1.68 (1.14-2.48) | 48.5                                                                   | 1.14 (0.79-1.66) | 67.2                                                                        | 0.83 (0.56-1.23) |
| 40-54             | 72.9                                                             | 1.94 (1.33-2.84) | 45.3                                                                   | 1.22 (0.84-1.76) | 62.8                                                                        | 0.67 (0.46-0.98) |
| 55+               | 65.9                                                             | 1.55 (1.06-2.28) | 37.0                                                                   | 1.07 (0.73-1.56) | 57.4                                                                        | 0.54 (0.37-0.79) |
| Ethnicity         |                                                                  | p=.322           |                                                                        | p=.754           |                                                                             | p=.106           |
| White             | 68.5                                                             | 1.00             | 42.9                                                                   | 1.00             | 62.7                                                                        | 1.00             |
| Non-white         | 70.8                                                             | 1.21 (0.83-1.76) | 49.7                                                                   | 1.06 (0.75-1.49) | 68.0                                                                        | 1.35 (0.94-1.94) |
| Household income  |                                                                  | p=.786           |                                                                        | p=.244           |                                                                             | p<.001           |
| Low               | 64.5                                                             | 1.00             | 38.7                                                                   | 1.00             | 61.8                                                                        | 1.00             |
| Moderate          | 70.7                                                             | 1.16 (0.79-1.70) | 43.5                                                                   | 1.05 (0.72-1.53) | 70.3                                                                        | 1.61 (1.08-2.40) |
| High              | 70.0                                                             | 1.11 (0.82-1.50) | 47.0                                                                   | 1.08 (0.81-1.45) | 64.0                                                                        | 1.25 (0.93-1.69) |
| No answer         | 66.4                                                             | 0.95 (0.59-1.53) | 32.1                                                                   | 0.67 (0.41-1.10) | 47.1                                                                        | 0.56 (0.35-0.90) |
| Education level   |                                                                  | p=.776           |                                                                        | p=.012           |                                                                             | p=.375           |
| Low               | 67.2                                                             | 1.00             | 36.5                                                                   | 1.00             | 66.1                                                                        | 1.00             |
| Moderate          | 68.3                                                             | 0.93 (0.71-1.23) | 42.1                                                                   | 1.05 (0.80-1.38) | 61.6                                                                        | 0.83 (0.63-1.08) |
| High              | 71.5                                                             | 1.03 (0.73-1.46) | 55.3                                                                   | 1.57 (1.13-2.18) | 63.7                                                                        | 0.89 (0.64-1.25) |
| Province/region   |                                                                  | p=.479           |                                                                        | p=.013           |                                                                             | p=.010           |
| Quebec            | 67.0                                                             | 1.00             | 42.4                                                                   | 1.00             | 67.0                                                                        | 1.00             |
| Atlantic†         | 76.0                                                             | 1.49 (0.91-2.44) | 51.1                                                                   | 1.60 (1.02-2.51) | 69.5                                                                        | 1.18 (0.74-1.88) |
| Ontario           | 70.2                                                             | 1.09 (0.81-1.48) | 41.4                                                                   | 0.92 (0.69-1.24) | 65.3                                                                        | 0.99 (0.74-1.33) |
| Prairie‡          | 63.0                                                             | 0.88 (0.55-1.41) | 50.5                                                                   | 1.57 (1.01-2.45) | 50.8                                                                        | 0.51 (0.32-0.80) |
| Alberta           | 66.5                                                             | 0.88 (0.58-1.33) | 39.3                                                                   | 0.79 (0.52-1.20) | 60.2                                                                        | 0.77 (0.51-1.17) |
| British Columbia  | 70.5                                                             | 1.05 (0.68-1.63) | 50.4                                                                   | 1.32 (0.86-2.01) | 58.1                                                                        | 0.67 (0.44-1.02) |



|                                |      |                  |      |                  |      |                  |
|--------------------------------|------|------------------|------|------------------|------|------------------|
| Smoking status                 |      | p=.073           |      | p<.001           |      | p=.770           |
| Non-daily smoker               | 71.8 | 1.00             | 63.3 | 1.00             | 61.5 | 1.00             |
| Daily smoker                   | 67.7 | 0.74 (0.53-1.03) | 36.9 | 0.41 (0.30-0.56) | 64.2 | 1.05 (0.76-1.45) |
| E-cigarette use status         |      | p=.136           |      | p=.016           |      | p<.001           |
| Smoker                         | 68.5 | 1.00             | 43.1 | 1.00             | 61.7 | 1.00             |
| Dual user                      | 70.9 | 1.16 (0.96-1.40) | 49.4 | 1.26 (1.04-1.51) | 74.5 | 1.67 (1.38-2.02) |
| CPD                            |      | p=.563           |      | p<.001           |      | p=.177           |
| <10                            | 69.9 | 1.00             | 53.7 | 1.00             | 62.6 | 1.00             |
| 11-20                          | 69.5 | 1.05 (0.77-1.42) | 36.6 | 0.75 (0.56-1.01) | 63.7 | 1.16 (0.86-1.56) |
| 21-30                          | 62.7 | 0.80 (0.54-1.19) | 22.7 | 0.40 (0.26-0.61) | 64.6 | 1.23 (0.83-1.82) |
| >30                            | 65.8 | 1.02 (0.46-2.27) | 31.6 | 0.72 (0.30-1.76) | 77.4 | 2.51 (1.06-5.98) |
| Plans to quit in next 6 months |      | p<.001           |      | p<.001           |      | p=.020           |
| No                             | 59.3 | 1.00             | 36.9 | 1.00             | 56.9 | 1.00             |
| Yes                            | 72.5 | 1.86 (1.44-2.41) | 46.7 | 1.95 (1.50-2.55) | 66.0 | 1.35 (1.05-1.73) |

<sup>s</sup> Logistic regression models control for smokers' perceptions of societal attitudes towards smoking, and beliefs that smokers are increasingly marginalized.

†“Atlantic”: Newfoundland and Labrador, Prince Edward Island, Nova Scotia, New Brunswick

‡“Prairie”: Manitoba and Saskatchewan

**Table 6.** Factors associated with support for e-cigarette policies

|                                | Require same minimum age for purchase as cigarettes <sup>S</sup> |                  | Restrict nicotine in e-cigarettes/e-liquid <sup>S</sup> |                  | Ban use in smoke-free places <sup>S</sup> |                  | Ban e-cigarette/ e-liquid promotions <sup>S</sup> |                  | Ban fruit and candy flavoured e-cigarettes <sup>S</sup> |                  |
|--------------------------------|------------------------------------------------------------------|------------------|---------------------------------------------------------|------------------|-------------------------------------------|------------------|---------------------------------------------------|------------------|---------------------------------------------------------|------------------|
|                                | %Support                                                         | OR (95% CI)      | %Support                                                | OR (95% CI)      | %Support                                  | OR (95% CI)      | %Support                                          | OR (95% CI)      | %Support                                                | OR (95% CI)      |
| Overall                        | 86.5                                                             |                  | 65.7                                                    |                  | 65.7                                      |                  | 57.3                                              |                  | 43.1                                                    |                  |
| Gender                         |                                                                  | p=.067           |                                                         | p=.267           |                                           | p=.191           |                                                   | p=.865           |                                                         | p=.394           |
| Female                         | 87.7                                                             | 1.00             | 66.1                                                    | 1.00             | 67.0                                      | 1.00             | 56.6                                              | 1.00             | 40.0                                                    | 1.00             |
| Male                           | 85.6                                                             | 0.74 (0.53-1.02) | 65.5                                                    | 0.88 (0.70-1.10) | 64.8                                      | 0.86 (0.69-1.08) | 57.8                                              | 0.98 (0.79-1.22) | 45.2                                                    | 1.10 (0.88-1.37) |
| Age Group (years)              |                                                                  | p=.031           |                                                         | p=.285           |                                           | p=.462           |                                                   | p=.470           |                                                         | p<.001           |
| 18-24                          | 83.3                                                             | 1.00             | 62.6                                                    | 1.00             | 62.4                                      | 1.00             | 57.5                                              | 1.00             | 32.5                                                    | 1.00             |
| 25-39                          | 84.4                                                             | 1.24 (0.75-2.07) | 69.7                                                    | 1.29 (0.87-1.91) | 69.1                                      | 1.26 (0.85-1.87) | 56.6                                              | 0.82 (0.56-1.19) | 39.4                                                    | 1.15 (0.77-1.73) |
| 40-54                          | 89.2                                                             | 2.03 (1.25-3.31) | 67.4                                                    | 1.28 (0.88-1.85) | 67.3                                      | 1.31 (0.90-1.90) | 58.7                                              | 1.04 (0.72-1.51) | 44.6                                                    | 1.63 (1.11-2.40) |
| 55+                            | 86.7                                                             | 1.60 (0.96-2.66) | 61.4                                                    | 1.03 (0.71-1.51) | 62.2                                      | 1.14 (0.78-1.66) | 56.5                                              | 1.04 (0.71-1.52) | 49.5                                                    | 2.11 (1.41-3.15) |
| Ethnicity                      |                                                                  | p=.139           |                                                         | p=.886           |                                           | p=.678           |                                                   | p=.017           |                                                         | p=.642           |
| White                          | 86.2                                                             | 1.00             | 65.8                                                    | 1.00             | 65.6                                      | 1.00             | 58.2                                              | 1.00             | 43.7                                                    | 1.00             |
| Non-white                      | 88.0                                                             | 1.44 (0.89-2.34) | 65.0                                                    | 0.98 (0.68-1.39) | 66.1                                      | 0.93 (0.65-1.32) | 52.1                                              | 0.67 (0.48-0.93) | 39.7                                                    | 0.92 (0.65-1.30) |
| Household income               |                                                                  | p=.664           |                                                         | p=.008           |                                           | p=.221           |                                                   | p=.015           |                                                         | p=.010           |
| Low                            | 84.3                                                             | 1.00             | 58.2                                                    | 1.00             | 58.9                                      | 1.00             | 50.3                                              | 1.00             | 41.2                                                    | 1.00             |
| Moderate                       | 84.5                                                             | 0.81 (0.48-1.36) | 68.6                                                    | 1.41 (0.97-2.04) | 62.2                                      | 1.05 (0.72-1.52) | 55.6                                              | 1.13 (0.78-1.64) | 46.0                                                    | 1.03 (0.71-1.51) |
| High                           | 87.3                                                             | 1.03 (0.68-1.55) | 68.9                                                    | 1.31 (0.97-1.76) | 68.5                                      | 1.31 (0.97-1.78) | 61.5                                              | 1.38 (1.03-1.86) | 44.8                                                    | 0.89 (0.65-1.21) |
| No answer                      | 89.3                                                             | 1.22 (0.63-2.39) | 52.1                                                    | 0.68 (0.43-1.09) | 68.7                                      | 1.41 (0.86-2.30) | 44.0                                              | 0.73 (0.46-1.18) | 27.0                                                    | 0.45 (0.27-0.74) |
| Education level                |                                                                  | p=.143           |                                                         | p=.399           |                                           | p=.714           |                                                   | p=.017           |                                                         | p=.035           |
| Low                            | 86.5                                                             | 1.00             | 62.9                                                    | 1.00             | 61.9                                      | 1.00             | 51.4                                              | 1.00             | 39.5                                                    | 1.00             |
| Moderate                       | 85.1                                                             | 0.70 (0.48-1.03) | 64.2                                                    | 0.88 (0.67-1.15) | 65.4                                      | 1.03 (0.78-1.36) | 56.0                                              | 1.09 (0.84-1.41) | 41.6                                                    | 0.99 (0.76-1.30) |
| High                           | 88.8                                                             | 0.92 (0.56-1.50) | 71.4                                                    | 1.06 (0.75-1.50) | 70.3                                      | 1.15 (0.81-1.63) | 66.2                                              | 1.59 (1.14-2.23) | 49.9                                                    | 1.43 (1.03-1.99) |
| Province/region                |                                                                  | p=.047           |                                                         | p=.043           |                                           | p=.627           |                                                   | p<.001           |                                                         | p=.726           |
| Quebec                         | 90.1                                                             | 1.00             | 72.3                                                    | 1.00             | 66.7                                      | 1.00             | 65.3                                              | 1.00             | 43.8                                                    | 1.00             |
| Atlantic†                      | 84.6                                                             | 0.59 (0.33-1.07) | 65.0                                                    | 0.74 (0.45-1.20) | 65.0                                      | 0.86 (0.54-1.38) | 51.0                                              | 0.50 (0.31-0.79) | 45.2                                                    | 1.02 (0.64-1.62) |
| Ontario                        | 84.8                                                             | 0.54 (0.36-0.82) | 62.8                                                    | 0.64 (0.47-0.86) | 66.0                                      | 0.88 (0.65-1.18) | 54.9                                              | 0.60 (0.45-0.80) | 44.6                                                    | 0.95 (0.72-1.26) |
| Prairie‡                       | 87.6                                                             | 0.78 (0.39-1.56) | 58.5                                                    | 0.56 (0.36-0.88) | 66.4                                      | 0.97 (0.61-1.55) | 54.1                                              | 0.61 (0.40-0.96) | 37.6                                                    | 0.79 (0.50-1.26) |
| Alberta                        | 85.0                                                             | 0.50 (0.28-0.90) | 65.8                                                    | 0.69 (0.45-1.04) | 62.0                                      | 0.68 (0.45-1.03) | 49.7                                              | 0.45 (0.30-0.67) | 38.5                                                    | 0.74 (0.49-1.13) |
| British Columbia               | 85.3                                                             | 0.50 (0.28-0.91) | 65.1                                                    | 0.65 (0.42-1.00) | 67.1                                      | 0.90 (0.58-1.41) | 63.6                                              | 0.85 (0.55-1.31) | 45.6                                                    | 0.97 (0.65-1.47) |
| Smoking status                 |                                                                  | p=.340           |                                                         | p<.001           |                                           | p=.022           |                                                   | p=.078           |                                                         | p=.011           |
| Non-daily smoker               | 88.4                                                             | 1.00             | 76.1                                                    | 1.00             | 75.0                                      | 1.00             | 66.1                                              | 1.00             | 47.5                                                    | 1.00             |
| Daily smoker                   | 85.8                                                             | 0.80 (0.50-1.27) | 62.0                                                    | 0.50 (0.36-0.71) | 62.4                                      | 0.68 (0.48-0.95) | 54.2                                              | 0.75 (0.55-1.03) | 41.6                                                    | 0.67 (0.49-0.91) |
| E-cigarette use status         |                                                                  | p=.707           |                                                         | p=.044           |                                           | p<.001           |                                                   | p<.001           |                                                         | p<.001           |
| Smoker                         | 86.6                                                             | 1.00             | 66.0                                                    | 1.00             | 67.3                                      | 1.00             | 58.1                                              | 1.00             | 44.9                                                    | 1.00             |
| Dual user                      | 85.9                                                             | 0.95 (0.74-1.23) | 63.8                                                    | 0.83 (0.68-1.00) | 55.4                                      | 0.58 (0.48-0.70) | 52.3                                              | 0.71 (0.59-0.85) | 32.0                                                    | 0.56 (0.46-0.67) |
| CPD                            |                                                                  | p=.357           |                                                         | p=.113           |                                           | p=.03            |                                                   | p=.006           |                                                         | p=.090           |
| <10                            | 87.6                                                             | 1.00             | 70.1                                                    | 1.00             | 71.0                                      | 1.00             | 62.8                                              | 1.00             | 44.7                                                    | 1.00             |
| 11-20                          | 86.7                                                             | 0.90 (0.59-1.39) | 62.7                                                    | 0.93 (0.69-1.24) | 62.2                                      | 0.78 (0.56-1.05) | 54.0                                              | 0.80 (0.60-1.07) | 40.6                                                    | 0.88 (0.65-1.18) |
| 21-30                          | 81.7                                                             | 0.66 (0.39-1.10) | 54.3                                                    | 0.68 (0.46-1.00) | 52.9                                      | 0.56 (0.38-0.82) | 42.7                                              | 0.49 (0.33-0.73) | 41.5                                                    | 0.87 (0.58-1.30) |
| >30                            | 81.4                                                             | 0.63 (0.25-1.60) | 68.8                                                    | 1.46 (0.70-3.06) | 56.7                                      | 0.73 (0.35-1.52) | 54.8                                              | 0.90 (0.44-1.86) | 58.8                                                    | 2.00 (1.02-3.91) |
| Plans to quit in next 6 months |                                                                  | p=.01            |                                                         | p<.001           |                                           | p=.012           |                                                   | p<.001           |                                                         | p<.001           |
| No                             | 83.5                                                             | 1.00             | 58.1                                                    | 1.00             | 62.2                                      | 1.00             | 51.1                                              | 1.00             | 32.8                                                    | 1.00             |
| Yes                            | 87.6                                                             | 1.56 (1.11-2.19) | 68.6                                                    | 1.75 (1.36-2.26) | 67.0                                      | 1.39 (1.08-1.79) | 59.7                                              | 1.59 (1.23-2.05) | 47.1                                                    | 2.14 (1.64-2.79) |

<sup>S</sup> Logistic regression models control for smokers' perceptions of societal attitudes towards smoking, and beliefs that smokers are increasingly marginalized.

†“Atlantic”: Newfoundland and Labrador, Prince Edward Island, Nova Scotia, New Brunswick

‡“Prairie”: Manitoba and Saskatchewan
